1 **Determining the stages of cellular differentiation using Deep Ultraviolet Resonance Raman**  
2 **Spectroscopy**

3 Nicole M. Ralbovsky<sup>1,2</sup>, Paromita Dey<sup>2</sup>, Bijan K. Dey<sup>2,3\*</sup> and Igor K. Lednev<sup>1,2,3\*</sup>

4 <sup>1</sup>Department of Chemistry, University at Albany, SUNY, 1400 Washington Avenue, Albany, NY  
5 12222, USA

6 <sup>2</sup>The RNA Institute, University at Albany, SUNY, 1400 Washington Avenue, Albany, NY 12222,  
7 USA

8 <sup>3</sup>Department of Biological Sciences, University at Albany, SUNY, 1400 Washington Avenue,  
9 Albany, NY 12222, USA

10 \*corresponding authors: Bijan K. Dey, Ph.D., email: [bdey@albany.edu](mailto:bdey@albany.edu), phone: 518-437-4481;  
11 Igor K. Lednev, Ph.D., email: [ilednev@albany.edu](mailto:ilednev@albany.edu), phone: 518-591-8863

12

13 **Abstract**

14 Cellular differentiation is a fundamental process in which one cell type changes into one or more  
15 specialized cell types. Cellular differentiation starts at the beginning of embryonic development  
16 when a simple zygote begins to transform into a complex multicellular organism composed of  
17 various cell and tissue types. This process continues into adulthood when adult stem cells  
18 differentiate into more specialized cells for normal growth, regeneration, repair, and cellular  
19 turnover. Any abnormalities associated with this fundamental process of cellular differentiation is  
20 linked to life threatening conditions including degenerative diseases and cancers. Detection of  
21 undifferentiated and different stages of differentiated cells can be used for disease diagnosis but is

22 often challenging due to the laborious procedures, expensive tools, and specialized technical skills  
23 which are required. Here, a novel approach, called deep ultraviolet resonance Raman spectroscopy,  
24 is used to study various stages of cellular differentiation using a well-known myoblast cell line as  
25 a model system. These cells proliferate in the growth medium and spontaneously differentiate in  
26 differentiation medium into myocytes and later into myotubes and myofibers. The cellular and  
27 molecular characteristics of these cells mimic very well actual muscle tissue *in vivo*. We have  
28 found that undifferentiated myoblast cells and myoblast cells differentiated at three different stages  
29 are able to be easily separated using deep ultraviolet resonance Raman spectroscopy in  
30 combination with chemometric techniques. Our study has a great potential to study cellular  
31 differentiation during normal development as well as to detect abnormal cellular differentiation in  
32 human pathological conditions in future studies.

### 33 **Introduction**

34 Within multicellular organisms, tissues are organized as a collection of cells which differentiate  
35 from totipotent fertilized embryos to carry out specific physiological functions. The balance  
36 between cellular proliferation and differentiation is critical for normal physiological function and  
37 health. Disruption of this balance is associated with numerous human conditions including  
38 degenerative diseases(1) and cancer(2). In this study, a skeletal muscle stem cell (MuSCs)-derived  
39 myoblast cell line is used as a model system. Postnatal skeletal muscle development, growth,  
40 regeneration, and maintenance of homeostasis depends on MuSCs, also known as satellite cells.  
41 MuSCs reside beneath the basal lamina juxtaposed to the muscle fiber and are mitotically  
42 quiescent. In response to muscle injury, quiescent MuSCs are activated to reenter the cell cycle,  
43 followed by proliferation to form a pool of myoblasts, and eventually exit at the G1 phase in the  
44 cycle to then differentiate and fuse into newly formed or existing myofibers. A subset of MuSCs

45 are self-renewed and return to quiescence. This extensive process of making new muscle fibers is  
46 known as myogenesis and is quintessential for normal physiological function. If anything goes  
47 awry in these processes at the cellular or molecular level, human diseases like Duchenne muscular  
48 dystrophy or soft tissue cancer, called rhabdomyosarcoma, can arise. The gene expression  
49 program, including transcription factors and signaling molecules that govern myogenesis, has been  
50 well characterized. However, the processes involved to determine the stages of cellular  
51 differentiation through measurement of these molecular signatures are laborious and expensive  
52 and require specialized skills to implement. Thus, a new method for achieving this goal was  
53 explored using deep ultraviolet resonance Raman spectroscopy (DUVRS).

54 The advantages of DUVRS make it a suitable method for exploring various biological specimens  
55 and phenomena. DUVRS has been used in the past for investigating malignant biological  
56 specimens(3), respiratory diseases(4), and for studying protein structure and transformation(5-7)  
57 as well examining protein aggregates and fibrillogenesis.(8-11) Excitation in the deep ultraviolet  
58 (UV) range is known to enhance the inelastic scattering of many biological samples.(12)  
59 Specifically, the Raman signal of polypeptide side chains including aromatic amino acids are  
60 strongly resonantly enhanced. Aromatic amino acids such as tryptophan and tyrosine strongly  
61 absorb UV light around 280 nm and 230 nm which allows for the resonance enhancement of their  
62 Raman scattering.(12) Strong resonance enhancement of Raman scattering from phenylalanine  
63 occurs at deep UV excitation below 200 nm.(10) Resonance Raman spectra of aromatic amino  
64 acid residues provide important information about the tertiary structure of proteins. Additionally,  
65 deep UV excitation resonantly enhances the Raman scattering of the amide chromophore, a  
66 building block of the polypeptide backbone.(13) This enhancement provides information  
67 regarding the secondary structure of a protein; as such, DUVRS is extremely useful for

68 investigating proteins within biological samples. Resonance enhancement of nucleic acids has  
69 additionally been observed via deep UV excitation due to their absorption of light in the same  
70 range.(14, 15) Both proteins and nucleic acids play influential roles in biochemical processes and  
71 are therefore anticipated to be useful for distinguishing between biological samples, making deep  
72 UV excitation uniquely advantageous when compared to excitation using visible or near-IR light.  
73 Along with providing unique enhancement of signals from crucial biomolecules, DUVRS typically  
74 produces a stronger signal-to-noise ratio in the resultant Raman spectrum due to the absence of  
75 fluorescence interference.(16) Fluorescence typically occurs at wavelengths longer than 250 nm,  
76 thus shifting the Raman excitation wavelength to be shorter than 250 nm will allow for a much  
77 better quality spectrum to be obtained due to the lack of fluorescence interference.(12) A better signal-  
78 to-noise ratio is crucial for examining biological samples such as cells in a liquid suspension.  
79 Typical Raman excitation in the visible or near-IR range will not produce the same quality of  
80 spectrum due to strong fluorescence accompanied with such a sample.

81 DUVRS is used here to investigate various stages of myoblast differentiation. Results show that  
82 all four stages which were studied were successfully discriminated from each other using  
83 chemometric analysis. These results indicate the potential of the method to study abnormal and/or  
84 differential cellular differentiation in human pathological conditions including cancer, such as  
85 rhabdomyosarcoma, that arise from abnormal myoblast differentiation.(2)

## 86 **Materials and Methods**

### 87 *Myoblast cell culture and differentiation assay*

88 Mouse myoblast cell line (C2C12) was acquired from the American Type Culture Collection  
89 (ATCC; Manassas, VA, USA). Cells were maintained at subconfluent densities in growth medium

90 (GM) at 37 °C in a tissue culture incubator with a constant supply of 5% CO<sub>2</sub>. GM was made up  
91 of Dulbecco's modified Eagle medium (DMEM; Life Technologies, Carlsbad, CA, USA)  
92 supplemented with 10% FBS and 1X antibiotic-antimycotic (Life Technologies).(17, 18) For  
93 myogenic differentiation assays, the C2C12 myoblast cells were grown to about 75% confluency,  
94 washed with 1X phosphate-buffered saline (PBS), and cultured with differentiation medium (DM).  
95 DM was made up of DMEM containing 2% heat-inactivated horse serum (HyClone) and 1X  
96 antibiotic-antimycotic (Life Technologies).(17, 18) Cells were harvested while growing in GM  
97 and after 48 hours (DM2), 96 hours (DM4) and 144 hours (DM6) in DM. The images of  
98 undifferentiated (GM) and different stages of differentiated (DM2, DM4 and DM6) samples were  
99 taken using EVOS Cell Imaging Systems (Thermo Fisher Scientific, Waltham, MA, USA).

100 *Total RNA isolation and quantitative reverse transcription polymerase chain reaction (qRT-PCR)*  
101 *assays*

102 Total RNA was extracted using RNEasy mini kit (Qiagen, Hilden, Germany) by following the  
103 manufacturer's instructions. cDNA synthesis was carried out using the iScript cDNA Synthesis  
104 Kit (Bio-Rad, Hercules, CA, USA) as instructed. Then, qRT-PCR was carried out using Sybr green  
105 PCR master mix (Bio-Rad) in a Bio-Rad thermal cycler using Myogenin and Myosin Heavy Chain  
106 (MHC) specific primers. GAPDH primer pairs were used as a housekeeping gene for normalizing  
107 the values of Myogenin and MHC.

108 *DUVRS analysis of myoblasts*

109 A total of 31 cell samples were analyzed from four different stages of myoblast cell differentiation,  
110 including undifferentiated cells (GM, n=8) and cells allowed to differentiate in DM for 48 (DM2,  
111 n=8), 96 (DM4, n=8), and 144 hours (DM6, n=7). All samples were analyzed using a custom-built

112 deep ultraviolet Raman spectrograph (details of which can be found elsewhere).(19) Briefly, the  
113 samples were excited using 198-nm radiation generated at the 5<sup>th</sup> anti-Stokes shift from the third  
114 harmonic of a Ni-YAG laser in a Raman shifter which is filled with low pressure hydrogen. A UV  
115 laser beam (at a power of about 0.5 mW at the surface of the sample) was focused within a spinning  
116 Suprasil NMR tube which contained approximately 200  $\mu$ L of sample solution. The solution was  
117 kept continuously spinning with a magnetic stir bar to prevent burning of the sample. Scattered  
118 radiation was collected in the backscattering geometry, dispersed via a double monochromator,  
119 and detected using a liquid-nitrogen cooled CCD camera.

120 To acquire the DUVRS spectral data, 20 accumulations of 30 s each were collected per sample.  
121 Each accumulation was saved as an individual spectrum to obtain multiple spectra per sample to  
122 use for statistical analysis. A comparison was made between the individual spectra acquired for  
123 each sample; no gradual changes to the spectra with respect to accumulation number were  
124 observed, indicating sample photodegradation due to UV radiation did not occur.

#### 125 *DUVRS data analysis*

126 620 spectra were obtained from all samples and loaded into GRAMS v9.2 software (Thermo Fisher  
127 Scientific). The spectral signature of the quartz NMR tube and of the buffer solution was subtracted  
128 from each spectrum individually. Spectra were then calibrated from pixels to wavenumbers using  
129 the DUVRS spectrum of Teflon as a standard.

#### 130 *Chemometric analysis*

131 PLS\_Toolbox (Eigenvector Research Inc., Wenatchee, WA, USA) operating within MATLAB  
132 software (version 2017b, Mathworks, Inc, Natick, MA, USA) was used for chemometric analysis.  
133 Initially, preprocessing steps were performed including spectral smoothing, baseline correction,

134 and normalization. Following data processing, various chemometric methods were applied for  
135 distinguishing between the four stages of myoblast cell differentiation. The samples were split into  
136 two different datasets: a calibration dataset (n=27) and a validation dataset (n=4). The goal of the  
137 analysis was to separate all four stages of myoblast differentiation. Here, genetic algorithm (GA)  
138 was applied to reduce the complexity of the spectral dataset and to identify which features were  
139 the most useful for discrimination. Then, partial least squares discriminant analysis (PLS-DA) was  
140 performed using the GA-identified spectral dataset for building the quaternary model for  
141 classification purposes. The performance of the model was evaluated using the donors from the  
142 validation dataset.

## 143 **Results and Discussion**

144 The C2C12 myoblast cell line serves as an excellent model system for studying cellular  
145 differentiation. Differentiation of myoblast cells into myocytes, myotubes, or myofiber-like  
146 structures can be achieved in cell culture by reducing serum supplements. As shown in Figure 1,  
147 C2C12 myoblast cells proliferate in growth medium (GM) and differentiate in differentiation  
148 medium (DM). As the differentiation process progressed, myogenic markers, including Myogenin  
149 and MHC, were upregulated. We harvested 8 undifferentiated (GM), DM2, and DM4 samples  
150 each and 7 DM6 samples.

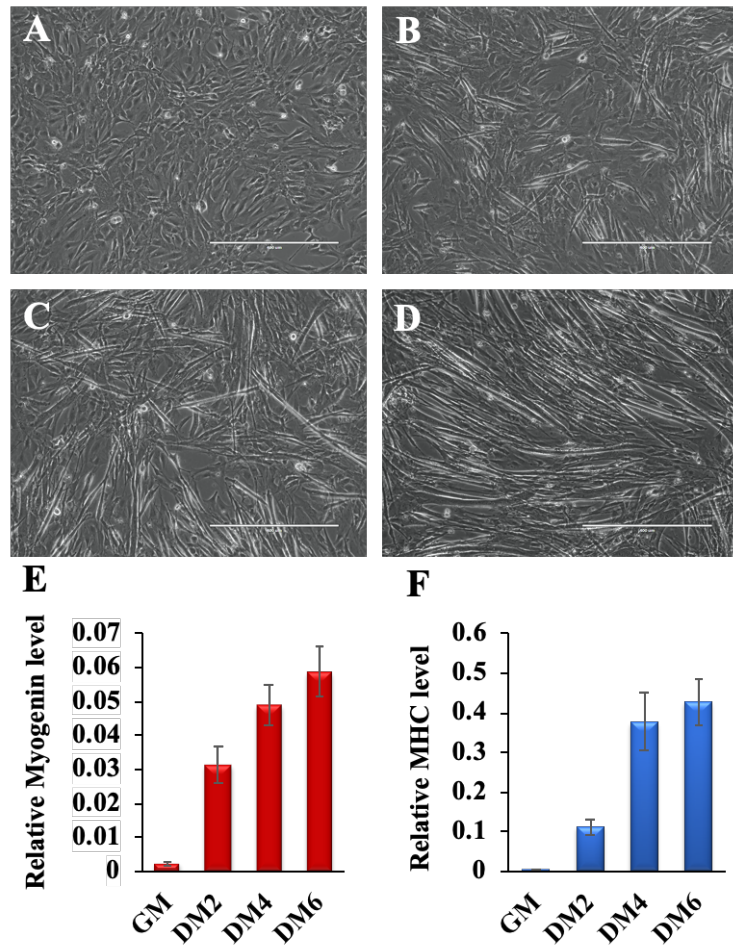

151

152 **Figure 1.** Myoblast cells (C2C12) proliferate in the growth medium and spontaneously  
153 differentiate when transferred to differentiation medium. (A) Undifferentiated and (B-D) different  
154 stages of differentiated myoblast cells are shown. (B) During early differentiation myoblast cells  
155 elongate and differentiate into myocytes and later (C) multiple myocytes fuse together to form  
156 myotubes, and subsequently (D) multiple myotubes align together to form myofiber-like  
157 structures. (E) An early differentiation marker, Myogenin and (F) a late myogenic marker, myosin  
158 heavy chain (MHC) mRNA levels are shown. Myogenin and MHC levels were normalized to  
159 GAPDH. As differentiation continues, both Myogenin and MHC expression levels are  
160 upregulated. All experiments were done with at least three or more biological replicates. Scale  
161 Bar: 400  $\mu$ M.



162 A total of 620 DUVRS spectra were collected from the 31 samples. The average spectrum for each  
163 of the four classes (GM, DM2, DM4, and DM6) is seen in Figure 2. Each spectrum is the average  
164 of all spectra collected from all samples in each class.

165

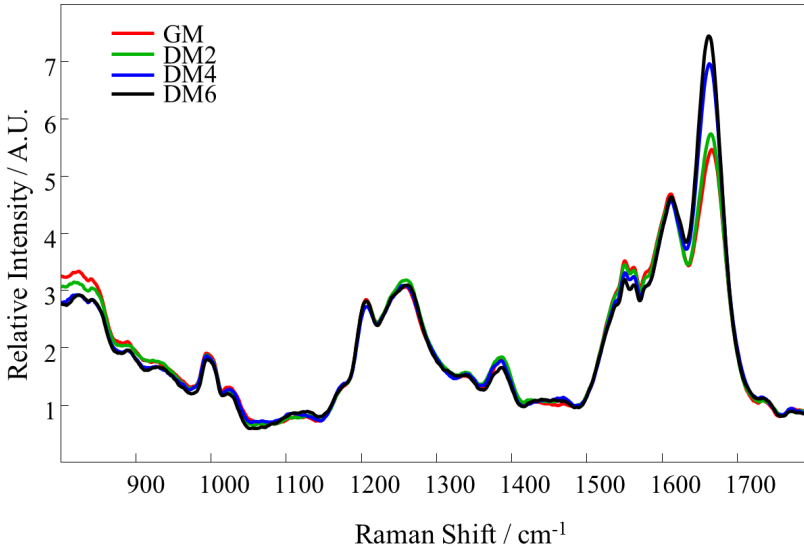

166

167 **Figure 2.** Average Raman spectra obtained for all samples of each of the four stages of myoblast  
168 differentiation including undifferentiated cells (GM, red) and cells allowed to differentiate for 48  
169 (DM2, green), 96 (DM4, blue), or 144 hours (DM6, black).

170 The average spectra appear very similar to each other – this is not surprising due to the anticipated  
171 high level of overlap in molecular composition between the differentiation stages. The majority of  
172 the peaks which contribute to the spectra correspond to proteins and nucleic acids. A summary of  
173 the main peaks and their tentative assignments is given in Table 1.

174

175

176 **Table 1.** Tentative assignments of the main peaks in the average Raman spectra of myoblasts at  
 177 progressive stages of differentiation(20)

| <b>Raman Shift (cm<sup>-1</sup>)</b> | <b>Tentative Assignment*</b>  | <b>Contribution</b> |
|--------------------------------------|-------------------------------|---------------------|
| <b>889</b>                           |                               | Proteins            |
| <b>930</b>                           | $\nu(\text{C-C})$             | Pro, Val (proteins) |
| <b>994</b>                           | Ring breathing, sym           | Phe (proteins)      |
| <b>1023</b>                          |                               | Glycogen            |
| <b>1030</b>                          | $\delta(\text{C-H})$ in-plane | Phe (proteins)      |
| <b>1176</b>                          | C, G                          | RNA/DNA             |
| <b>1206</b>                          | $\nu(\text{C-C}_6\text{H}_5)$ | Trp, Phe (proteins) |
| <b>1258</b>                          | Amide III                     | Proteins            |
| <b>1339</b>                          | A, G ring breathing           | DNA/RNA             |
| <b>1378-1387</b>                     | $\delta(\text{CH}_3)$ sym     | Lipids              |
| <b>1551</b>                          | $\nu(\text{C=C})$             | Trp (proteins)      |
| <b>1561</b>                          |                               | Trp (proteins)      |
| <b>1578</b>                          | Pyrimidine ring               | DNA/RNA             |
| <b>1612</b>                          | Cytosine (NH <sub>2</sub> )   | DNA/RNA             |
| <b>1664</b>                          | Amide I                       | Proteins            |

178 \*Notes:  $\nu$ , stretch;  $\delta$ , bend/scissor; sym, symmetric

179 *Analysis of all four stages of myoblast differentiation*

180 The small changes which are observed between the average spectra of the different myoblasts are  
 181 not found to be significant. The largest observable difference is seen at 1633 cm<sup>-1</sup>, however when

182 the differences in average intensities at each stage are compared with  $\pm 1$  standard deviations, the  
183 average intensity is not found to be significantly different between the groups (Figure 3). The same  
184 is found for other small changes in intensity, including the Raman peaks at  $1563\text{ cm}^{-1}$  and  $1561$   
185  $\text{cm}^{-1}$  (supplementary information Figures S.1 and S.2).

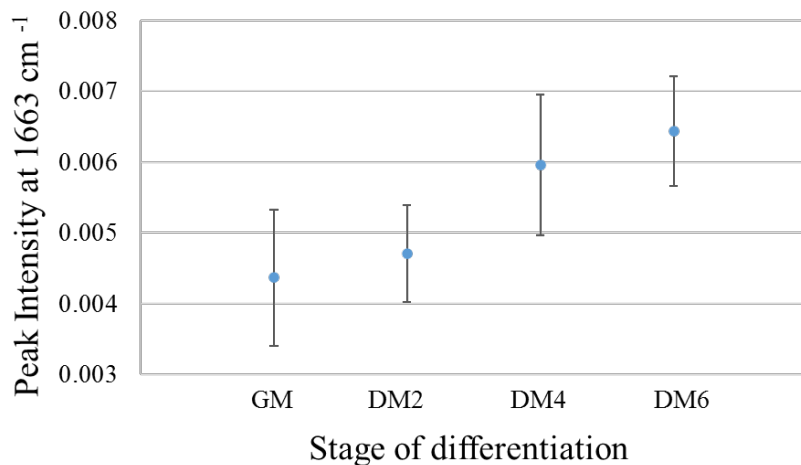

186  
187 **Figure 3.** The mean  $\pm 1$  standard deviation of the  $1633\text{ cm}^{-1}$  Raman peak intensity for each of the  
188 four classes, demonstrating insignificant differences as observed by the overlap in standard  
189 deviations between groups.

190 Statistical analysis was thus required to discriminate between the four stages of myoblast  
191 differentiation. Genetic algorithm was first employed to identify the subset of spectral features  
192 which were the most useful for distinguishing between the classes of data and which will support  
193 the prediction algorithm's capabilities. Results of GA (supplementary information, Figure S.3)  
194 indicated that proteins and DNA/RNA are the most influential biochemical components which  
195 allow for discriminating between the four stages. Myoblast differentiation is a dynamic and robust  
196 process; this process shows vigorous changes in a large number of gene expressions, which have  
197 been documented in numerous studies during myoblast differentiation.(21-25) Although gene

198 amplification usually occurs in cancer cells, a number of gene amplifications have been reported  
199 to occur during myoblast differentiation.(26) The global gene expression has found the changes in  
200 a large number of genes during myoblast differentiation shows.(21, 24, 25) Proteomic studies have  
201 further confirmed that a large number of proteins are up-regulated in the differentiated myoblast  
202 cells.(22, 23) Our own findings from RNA-seq data analysis show that more than four thousand  
203 genes are upregulated in the differentiated myotubes, and a subset of pro-myogenic genes such as  
204 Casq1, Myh3, Myh4, Actn2 are upregulated more than 2000-fold in these samples (data not  
205 shown). Therefore, it is not surprising to see that our findings detect and can discriminate the  
206 various stages of differentiated samples based on contributions from DNA/RNA and proteins.

207 Further, PLS-DA was performed using the GA-identified spectral dataset to build a discriminatory  
208 model. The 27 samples of the calibration dataset were used to build the algorithm, and the four  
209 samples of the validation dataset were set aside for independent external validation of the method.  
210 The model was built using three latent variables, which captured the maximum covariance between  
211 the groups. Through internal cross-validation, the model obtained an average accuracy of 75% for  
212 correctly predicting the class of a spectrum.

213 The spectral data of the four independent donors of the validation dataset were then loaded into  
214 the model. The spectral predictions generated for the four donors of the calibration dataset  
215 indicated 83% accuracy for external validation (Table 2, left panel). Using the spectral-level  
216 predictions, overall sample-level predictions were made; here, 100% accuracy was achieved for  
217 correctly predicting the stage of differentiation at the sample-level for each of the four samples  
218 used for external validation (Table 2, right panel).

219 **Table 2.** Classification predictions for all individual spectra (left) and overall sample-level  
 220 classification predictions (right) of the four independent samples used for external validation

| Individual Spectral Predictions |                        |            |            |            | External Validation Results |                        |                   |
|---------------------------------|------------------------|------------|------------|------------|-----------------------------|------------------------|-------------------|
| <i>Sample</i>                   | <i>Predicted Class</i> |            |            |            | <i>Sample</i>               | <i>Predicted Class</i> | <i>True Class</i> |
|                                 | <b>GM</b>              | <b>DM2</b> | <b>DM4</b> | <b>DM6</b> |                             |                        |                   |
| <b>#1</b>                       | 16                     | 4          | 0          | 0          | <b>#1</b>                   | GM                     | GM                |
| <b>#2</b>                       | 4                      | 16         | 0          | 0          | <b>#2</b>                   | DM2                    | DM2               |
| <b>#3</b>                       | 0                      | 4          | 14         | 2          | <b>#3</b>                   | DM4                    | DM4               |
| <b>#4</b>                       | 0                      | 0          | 7          | 13         | <b>#4</b>                   | DM6                    | DM6               |

221 An additional classification system was generated in a similar manner to discriminate between  
 222 early (GM and DM2) and late (DM4 and DM6) stages of myoblast cell differentiation in a binary  
 223 model; this model showed similar levels of success for class separation (supplementary  
 224 information Figure S.4)

225 The minimal changes in biochemical composition which occur are shown here to be sufficient for  
 226 discriminating between four different stages of myoblast differentiation. DNA/RNA and proteins  
 227 are indicated as the most significant classes of biomolecules for successful separation of the four  
 228 stages. Importantly, the results obtained during external validation support the capability of the  
 229 method for classifying spectral data from samples which were not used to build it. This indicates  
 230 the potential of the method to be expanded upon in the future for clinical applications, such as for  
 231 the analysis of abnormal cellular differentiation in human pathological conditions including cancer  
 232 and Duchenne muscular dystrophy. Conducting differentiation at the single cell level using  
 233 spontaneous Raman spectroscopy could also be possible, as the method was recently reported for

234 Celiac disease diagnostics based on analysis of a single red blood cell.(27)

235 Deep ultraviolet resonance Raman spectroscopy (DUVRS) is capable of capturing vital  
236 information regarding a biological samples' composition, including information regarding protein  
237 structure and nucleic acid composition. DUVRS is used in this study to successfully distinguish  
238 between myoblasts which were either undifferentiated or allowed to differentiate for varying  
239 numbers of hours. Specifically, a model was built using GA and PLS-DA for distinguishing  
240 between four stages of myoblast differentiation. This model achieved 100% successful  
241 classification at the level of individual sample during external validation. Analysis of the DUVRS  
242 spectra indicate that biochemical changes which occur during cell differentiation stem mostly from  
243 proteins and nucleic acids. DUVRS is fully capable of discriminating between the various stages  
244 of myoblast differentiation, opening the door for future exploration into cellular differentiation  
245 during normal development as well as into detecting abnormal cellular differentiation in human  
246 pathological conditions.

#### 247 **Acknowledgments**

248 This work was supported by the SUNY startup, the American Heart Association (AHA  
249 17SDG33670339) and the National Institute of Arthritis and Musculoskeletal and Skin Diseases,  
250 NIAMS (R15AR074728) grants to B.K.D. N.M.R was supported by NIH training Grant T32  
251 GM13206.

#### 252 **Conflict of Interest**

253 The authors have no conflicts to declare.

254

## 255 **References**

- 256 1. Dey BK, Gagan J, Yan Z, Dutta A. miR-26a is required for skeletal muscle differentiation and  
257 regeneration in mice. *Genes & Development*. 2012;26(19):2180-91.
- 258 2. Xia SJ, Pressey JG, Barr FG. Molecular pathogenesis of rhabdomyosarcoma. *Cancer Biology &*  
259 *Therapy*. 2002;1(2):97-104.
- 260 3. Ralbovsky NM, Egorov V, Moskovets E, Dey P, Dey BK, Lednev IK. Deep-Ultraviolet Raman  
261 Spectroscopy for Cancer Diagnostics: A Feasibility Study with Cell Lines and Tissues. *Cancer Studies and*  
262 *Molecule Medicine Open Journal*. 2019;5(1):1-10.
- 263 4. Žukovskaja O, Kloß S, Blango MG, Ryabchikov O, Kniemeyer O, Brakhage AA, et al. UV-Raman  
264 Spectroscopic Identification of Fungal Spores Important for Respiratory Diseases. *Analytical Chemistry*.  
265 2018;90(15):8912-8.
- 266 5. Shashilov VA, Sikirzhytski V, Popova LA, Lednev IK. Quantitative methods for structural  
267 characterization of proteins based on deep UV resonance Raman spectroscopy. *Methods*.  
268 2010;52(1):23-37.
- 269 6. Xu M, Ermolenkov VV, He W, Uversky VN, Fredriksen L, Lednev IK. Lysozyme fibrillation: Deep  
270 UV Raman spectroscopic characterization of protein structural transformation. *Biopolymers*.  
271 2005;79(1):58-61.
- 272 7. Oladepo SA, Xiong K, Hong Z, Asher SA, Handen J, Lednev IK. UV Resonance Raman  
273 Investigations of Peptide and Protein Structure and Dynamics. *Chemical Reviews*. 2012;112(5):2604-28.
- 274 8. Popova LA, Kodali R, Wetzel R, Lednev IK. Structural Variations in the Cross- $\beta$  Core of Amyloid  $\beta$   
275 Fibrils Revealed by Deep UV Resonance Raman Spectroscopy. *Journal of the American Chemical Society*.  
276 2010;132(18):6324-8.
- 277 9. Shashilov VA, Lednev IK. 2D Correlation Deep UV Resonance Raman Spectroscopy of Early  
278 Events of Lysozyme Fibrillation: Kinetic Mechanism and Potential Interpretation Pitfalls. *Journal of the*  
279 *American Chemical Society*. 2008;130(1):309-17.
- 280 10. Xu M, Ermolenkov VV, Uversky VN, Lednev IK. Hen egg white lysozyme fibrillation: a deep-UV  
281 resonance Raman spectroscopic study. *Journal of Biophotonics*. 2008;1(3):215-29.
- 282 11. Xu M, Shashilov V, Lednev IK. Probing the Cross- $\beta$  Core Structure of Amyloid Fibrils by  
283 Hydrogen–Deuterium Exchange Deep Ultraviolet Resonance Raman Spectroscopy. *Journal of the*  
284 *American Chemical Society*. 2007;129(36):11002-3.
- 285 12. Lednev IK. Biological Applications of Ultraviolet Raman Spectroscopy. In: Uversky VN, Permyakov  
286 EA, editors. *Methods in Protein Structure and Stability Analysis: Vibrational spectroscopy*: Nova  
287 Publishers; 2007.
- 288 13. Jakubek RS, Handen J, White SE, Asher SA, Lednev IK. Ultraviolet resonance Raman  
289 spectroscopic markers for protein structure and dynamics. *TrAC Trends in Analytical Chemistry*.  
290 2018;103:223-9.
- 291 14. Ziegler LD, Hudson B, Strommen DP, Peticolas W. Resonance Raman spectra of mononucleotides  
292 obtained with 266 and 213 nm ultraviolet radiation. *Biopolymers: Original Research on Biomolecules*.  
293 1984;23(10):2067-81.
- 294 15. Fodor SPA, Rava RP, Hays TR, Spiro TG. Ultraviolet resonance Raman spectroscopy of the  
295 nucleotides with 266-, 240-, 218-, and 200-nm pulsed laser excitation. *Journal of the American Chemical*  
296 *Society*. 1985;107(6):1520-9.
- 297 16. Khalil AA. Biomarker discovery: a proteomic approach for brain cancer profiling. *Cancer Science*.  
298 2007;98(2):201-13.

- 299 17. Dey BK, Pfeifer K, Dutta A. The H19 long noncoding RNA gives rise to microRNAs miR-675-3p and  
300 miR-675-5p to promote skeletal muscle differentiation and regeneration. *Genes & Development*.  
301 2014;28(5):491-501.
- 302 18. Dey BK, Gagan J, Dutta A. miR-206 and-486 induce myoblast differentiation by downregulating  
303 Pax7. *Molecular and Cellular Biology*. 2011;31(1):203-14.
- 304 19. Lednev IK, Ermolenkov VV, He W, Xu M. Deep-UV Raman spectrometer tunable between 193  
305 and 205 nm for structural characterization of proteins. *Analytical and bioanalytical chemistry*.  
306 2005;381(2):431-7.
- 307 20. Talari ACS, Movasaghi Z, Rehman S, Rehman IU. Raman spectroscopy of biological tissues.  
308 *Applied Spectroscopy Reviews*. 2015;50(1):46-111.
- 309 21. Tripathi AK, Patel AK, Shah RK, Patel AB, Shah TM, Bhatt VD, et al. Transcriptomic dissection of  
310 myogenic differentiation signature in caprine by RNA-Seq. *Mech Dev*. 2014;132:79-92.
- 311 22. Casadei L, Vallorani L, Gioacchini AM, Guescini M, Burattini S, D'Emilio A, et al. Proteomics-based  
312 investigation in C2C12 myoblast differentiation. *Eur J Histochem*. 2009;53(4):e31.
- 313 23. Kislinger T, Gramolini AO, Pan Y, Rahman K, MacLennan DH, Emili A. Proteome dynamics during  
314 C2C12 myoblast differentiation. *Mol Cell Proteomics*. 2005;4(7):887-901.
- 315 24. Moran JL, Li Y, Hill AA, Mounts WM, Miller CP. Gene expression changes during mouse skeletal  
316 myoblast differentiation revealed by transcriptional profiling. *Physiol Genomics*. 2002;10(2):103-11.
- 317 25. de Klerk E, Fokkema IF, Thiadens KA, Goeman JJ, Palmblad M, den Dunnen JT, et al. Assessing  
318 the translational landscape of myogenic differentiation by ribosome profiling. *Nucleic Acids Res*.  
319 2015;43(9):4408-28.
- 320 26. Fischer U, Ludwig N, Raslan A, Meier C, Meese E. Gene amplification during myogenic  
321 differentiation. *Oncotarget*. 2016;7(6):6864-77.
- 322 27. Ralbovsky NM, Lednev IK. Analysis of individual red blood cells for Celiac disease diagnosis.  
323 *Talanta*. 2021;221:121642.

324

325

326

327

328

329

330

331

332



333  
334  
335  
336  
337  
338  
339  
340  
341  
342  
343  
344  
345  
346

## Supplementary Information

### Determining the stages of cellular differentiation using Deep Ultraviolet Resonance Raman Spectroscopy

Nicole M. Ralbovsky<sup>1,2</sup>, Paromita Dey<sup>2</sup>, Bijan K. Dey<sup>2,3\*</sup> and Igor K. Lednev<sup>1,2,3\*</sup>

<sup>1</sup>Department of Chemistry, University at Albany, SUNY, 1400 Washington Avenue, Albany, NY 12222, USA

<sup>2</sup>The RNA Institute, University at Albany, SUNY, 1400 Washington Avenue, Albany, NY 12222, USA

<sup>3</sup>Department of Biological Sciences, University at Albany, SUNY, 1400 Washington Avenue, Albany, NY 12222, USA

\*corresponding authors: Bijan K. Dey, Ph.D., email: [bdey@albany.edu](mailto:bdey@albany.edu), phone: 518-437-4481; Igor K. Lednev, Ph.D., email: [ilednev@albany.edu](mailto:ilednev@albany.edu), phone: 518-591-8863

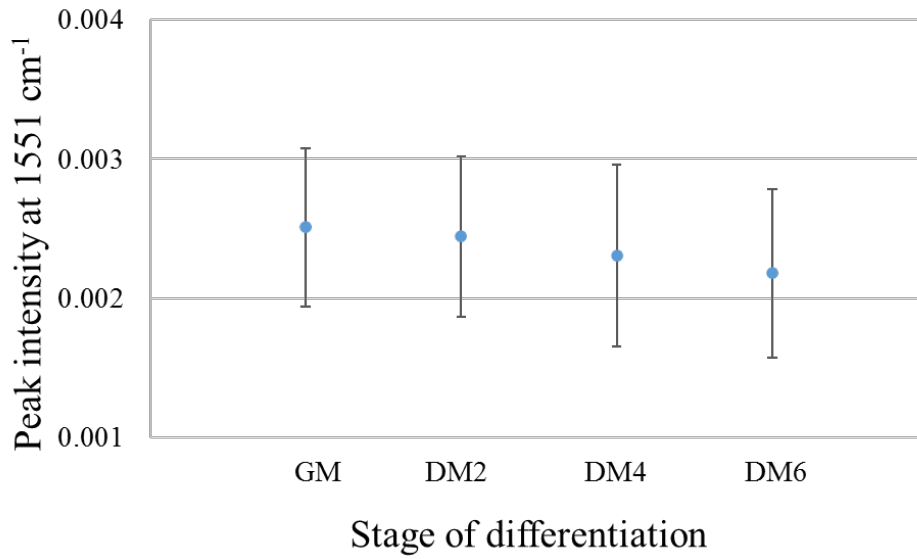

347

348 **Figure S.1.** The mean  $\pm 1$  standard deviation of the 1551 cm<sup>-1</sup> peak intensity for each of the four  
349 classes, demonstrating insignificant differences as observed by the overlap in standard deviations  
350 between groups.

351

352

353

354

355

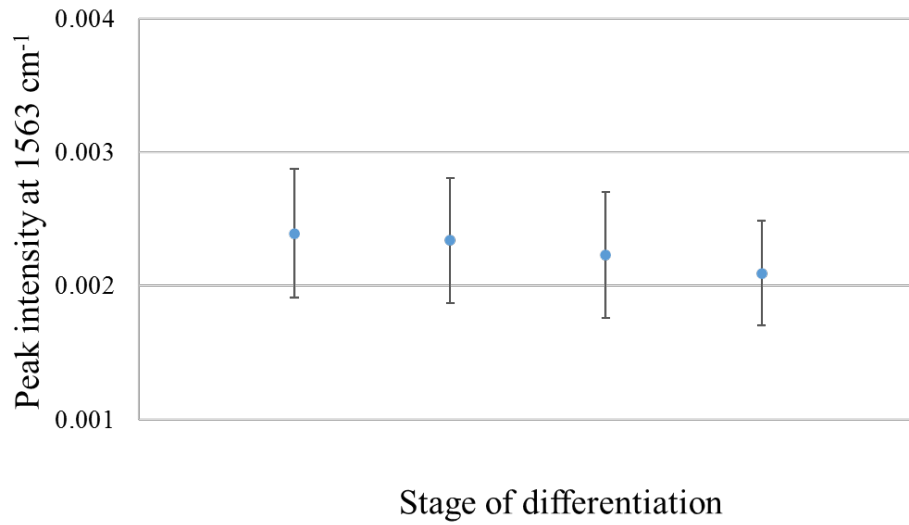

**Figure S.2.** The mean  $\pm 1$  standard deviation of the  $1563\text{ cm}^{-1}$  peak intensity for each of the four classes, demonstrating insignificant differences as observed by the overlap in standard deviations between groups.

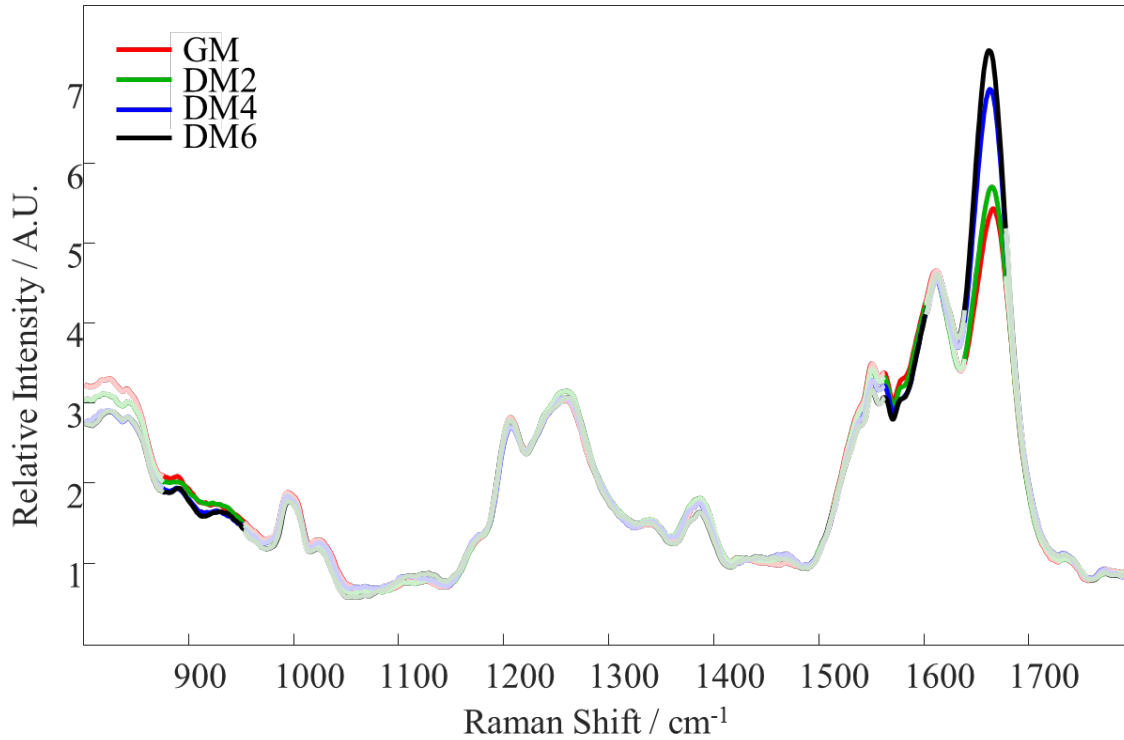

369

370 **Figure S.3.** Mean DUVRS spectra of myoblast cell differentiation at various stages, including the  
371 spectral ranges selected by genetic algorithm: GM (red), DM2 (green), DM4 (blue), and DM6  
372 (black). Areas selected by genetic algorithm are marked by bolded lines whereas spectral regions  
373 deemed uninformative for discrimination are seen as unfilled lines.

374

375

376

377

378

379

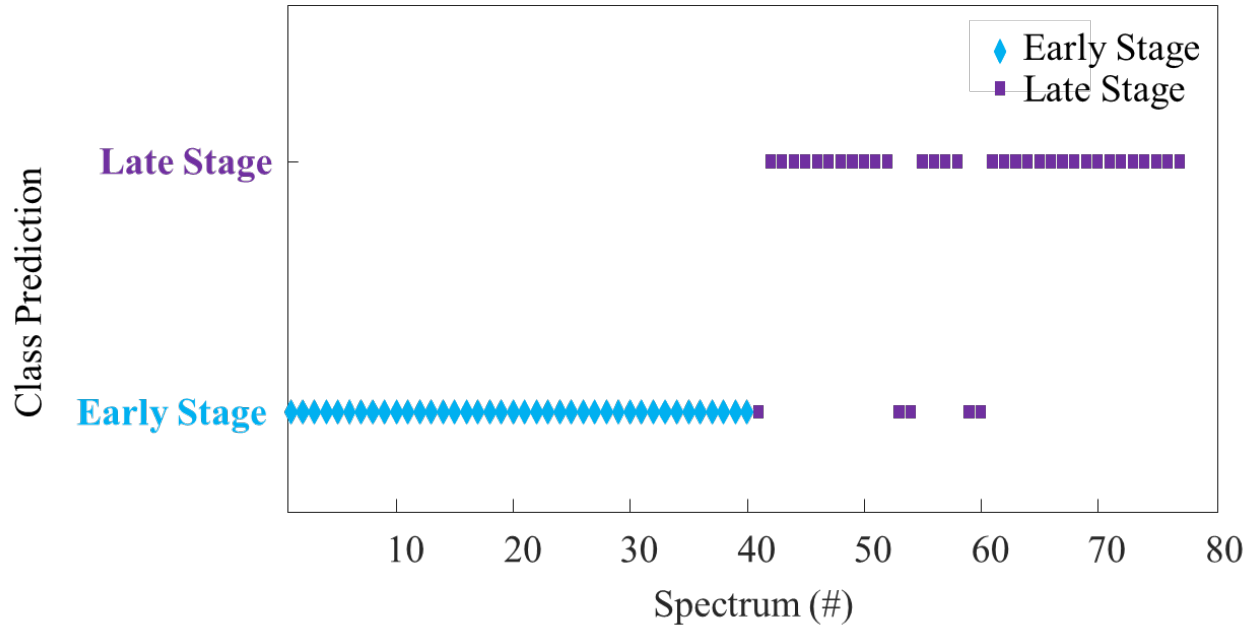

380

381 **Figure S.4.** Results of PLS-DA external validation of a binary model for discriminating between  
382 early (GM and DM2) and late (DM4 and DM6) stages of myoblast differentiation. Each spectrum  
383 from the validation dataset is plotted according to which class it was predicted as belonging: early  
384 stage (blue diamond) or late stage (purple square). Each symbol represents one spectrum.
